# Supplementary material for: Monohapto-allyl Pd(ii) complexes with bidentate hybrid P,N ligandsElectronic supplementary information (ESI) available: preparations and selected spectroscopic data for 1 and 4–6. See http://www.rsc.org/suppdata/dt/b2/b212393m/
Source: Royal Society of Chemistry journal article supplement (doi:10.1039/b212393m), 2003-01-21
Supplement: b212393m.pdf [file b212393m.pdf]

---

## Monohapto-allyl Pd(II) complexes with bidentate hybrid P,N ligands<sup>†</sup>

---

Pierre Braunstein,<sup>a</sup> Jing Zhang<sup>a</sup> and Richard Welter<sup>b</sup>

<sup>a</sup> *Laboratoire de Chimie de Coordination, UMR CNRS 7513, Université Louis Pasteur, 4 rue Blaise Pascal, F-67070 Strasbourg Cédex, France. E-mail: braunst@chimie.u-strasbg.fr*

<sup>b</sup> *Laboratoire DECMET, UMR CNRS 7513, Université Louis Pasteur, 4 rue Blaise Pascal, F-67070 Strasbourg Cédex, France*

---

**Complex [Pd( $\eta^1$ -C<sub>3</sub>H<sub>5</sub>)Cl(NOP<sup>Me</sup><sub>2</sub>-N,P)] 1:** the ligand NOP<sup>Me</sup><sub>2</sub> (0.370 g, 1.08 mmol) and [Pd( $\eta^3$ -C<sub>3</sub>H<sub>5</sub>)( $\mu$ -Cl)]<sub>2</sub> (0.200 g, 0.055 mmol) were dissolved in CH<sub>2</sub>Cl<sub>2</sub> (20 mL). The yellow solution was stirred for 1 h at room temperature, and the solvent was removed under vacuum. The residue was treated with pentane (30 mL), the off-white solid thus obtained was washed with pentane (2x20 mL) and dried under vacuum, to afford **1** (0.51 g, 89%). Spectroscopic data: IR (CH<sub>2</sub>Cl<sub>2</sub>): 1636 (s,  $\nu$ (CN)) cm<sup>-1</sup>. <sup>1</sup>H NMR (400.13 MHz, toluene-*d*<sub>8</sub>, 233 K):  $\delta$  1.56 (s, 6H, NC(CH<sub>3</sub>)<sub>2</sub>), 1.59 (s, 6H, OC(CH<sub>3</sub>)<sub>2</sub>), 3.00 (br, 2H, Pd-CH<sub>2</sub>), 3.23 (s, 2H, OCH<sub>2</sub>), 4.21 (d, 1H, <sup>3</sup>J<sub>HH</sub> = 16.4 Hz, =CHH trans to -CH=), 4.73 (d, 1H, <sup>3</sup>J<sub>HH</sub> = 8.0 Hz, =CHH cis to -CH=), 6.89 (m, 1H, -CH=), 7.03-7.07 (m, 6H, aromatic H), 7.55-7.60 (m, 4H, aromatic H). <sup>13</sup>C{<sup>1</sup>H} NMR (100 MHz, toluene-*d*<sub>8</sub>, 233 K):  $\delta$  27.3 (s, NC(CH<sub>3</sub>)<sub>2</sub>), 27.7 (d, <sup>3</sup>J<sub>PC</sub> = 5.0 Hz, OC(CH<sub>3</sub>)<sub>2</sub>), 29.5 (br, Pd-CH<sub>2</sub>-), 70.0 (s, NC(CH<sub>3</sub>)<sub>2</sub>), 76.8 (s, OC(CH<sub>3</sub>)<sub>2</sub>), 80.9 (s, OCH<sub>2</sub>), 105.9 (br, =CH<sub>2</sub>), 127.3-128.1 (overlapping d for toluene and *m*-aryl), 131.2 (s, *p*-aryl), 132.5 (d, <sup>2</sup>J<sub>PC</sub> = 13.8 Hz, *o*-aryl), 134.5 (d, <sup>1</sup>J<sub>PC</sub> = 54.7 Hz, *ipso*-aryl), 141.0 (br, CH=), 168.8 (d, <sup>3</sup>J<sub>PC</sub> = 4.0 Hz, C=N). <sup>31</sup>P{<sup>1</sup>H} NMR (121.5 MHz, CD<sub>2</sub>Cl<sub>2</sub>):  $\delta$  115.1(s). Anal. Found: C, 52.55; H, 5.45; N, 2.55. Calcd. for C<sub>23</sub>H<sub>29</sub>ClINO<sub>2</sub>PPd: C, 52.77; H, 5.59; N, 2.68%.

**Complex [Pd( $\eta^3$ -C<sub>3</sub>H<sub>5</sub>)(NOP<sup>Me</sup><sub>2</sub>-N,P)]PF<sub>6</sub> 4:** the ligand NOP<sup>Me</sup><sub>2</sub> (0.220 g, 0.65 mmol) and [Pd( $\eta^3$ -C<sub>3</sub>H<sub>5</sub>)( $\mu$ -Cl)]<sub>2</sub> (0.120 g, 0.32 mmol) were dissolved in CH<sub>2</sub>Cl<sub>2</sub> (20 mL). The yellow solution was stirred for 1 h at room temperature, then solid NH<sub>4</sub>PF<sub>6</sub> (0.110 g, 0.67 mmol) was added and the mixture was stirred for another 3 h and filtered. The filtrate was taken to dryness under vacuum and the residue was treated with pentane (30 mL), the off-white solid thus obtained was washed with pentane (2x20 mL) and dried under vacuum to afford **4** (0.320 g, 78%). Spectroscopic data: IR(CH<sub>2</sub>Cl<sub>2</sub>): 1630 (s,  $\nu$ (CN)) cm<sup>-1</sup>. <sup>1</sup>H NMR (300.13 MHz, CDCl<sub>3</sub>, rom temp.):  $\delta$  1.31 (s, 6H, NC(CH<sub>3</sub>)<sub>2</sub>), 1.71 (s, 3H, OC(CH<sub>3</sub>)(CH<sub>3</sub>)), 1.79 (s, 3H, OC(CH<sub>3</sub>)(CH<sub>3</sub>)), 2.89 (d, 1H, <sup>3</sup>J<sub>HH</sub> = 12.3 Hz, allylic H *cis* to P), 3.69 (d, 1H, <sup>3</sup>J<sub>HH</sub> = 6.9 Hz, allylic H *cis* to P), 3.92 (dd, 1H, <sup>3</sup>J<sub>HH</sub> = 11.1 Hz, <sup>3</sup>J<sub>PH</sub> = 14.1 Hz allylic H *trans* to P), AB spin system:  $\delta_A$  4.32 (d, 1H, <sup>2</sup>J<sub>HH</sub> = 9 Hz, OCHH),  $\delta_B$  4.34 (d, 1H, <sup>2</sup>J<sub>HH</sub> = 9Hz, OCHH), 5.13 (ddd, 1H, <sup>3</sup>J<sub>HH</sub> = 6.4 Hz, <sup>3</sup>J<sub>PH</sub> = 9.3 Hz, <sup>4</sup>J<sub>HH</sub> = 1.8 Hz, allyl H *trans* to P), 5.86 (m, 1H, -CH=), 7.42-7.53 (m, 10H, aryl). <sup>13</sup>C{<sup>1</sup>H} NMR (125.8 MHz, CD<sub>2</sub>Cl<sub>2</sub>, room temp.):  $\delta$  27.5 (s, NC(CH<sub>3</sub>)(CH<sub>3</sub>)), 27.7 (d, <sup>3</sup>J<sub>PC</sub> = 6.3 Hz, OC(CH<sub>3</sub>)(CH<sub>3</sub>)), 27.8 (s, NC(CH<sub>3</sub>)(CH<sub>3</sub>)), 28.3 (d, <sup>3</sup>J<sub>PC</sub> = 6.3Hz, OC(CH<sub>3</sub>)(CH<sub>3</sub>)), 55.3 (d, <sup>3</sup>J<sub>PC</sub> = 3.6 Hz, allylic CH<sub>2</sub> *cis* to P), 69.8 (s, NC(CH<sub>3</sub>)<sub>2</sub>), 79.2 (d, <sup>3</sup>J<sub>PC</sub> = 2.5 Hz, OC(CH<sub>3</sub>)<sub>2</sub>), 79.9 (d, <sup>3</sup>J<sub>PC</sub> = 32.6 Hz, allylic CH<sub>2</sub> *trans* to P), 80.6 (s, OCH<sub>2</sub>), 120.9 (d, <sup>3</sup>J<sub>PC</sub> = 6.9 Hz, allylic CH), 129.3 (d, <sup>3</sup>J<sub>PC</sub> = 11.5 Hz, *m*-aryl), 131.0 (d, <sup>2</sup>J<sub>PC</sub> = 15.4 Hz, *o*-aryl), 131.6 (d, <sup>2</sup>J<sub>PC</sub> = 15.9 Hz, *o*-aryl), 132.4 (d, <sup>4</sup>J<sub>PC</sub> = 2.4Hz, *p*-aryl), 132.6 (d, <sup>4</sup>J<sub>PC</sub> = 2.3 Hz, *p*-aryl), 133.7 (d, <sup>1</sup>J<sub>PC</sub> = 53.6 Hz, ipso-aryl), 134.4 (d, <sup>1</sup>J<sub>PC</sub>=51.6 Hz, *ipso*-aryl), 141.0 (br, CH=), 168.8 (d, <sup>3</sup>J<sub>PC</sub> = 4.0 Hz, C=N). <sup>31</sup>P{<sup>1</sup>H} NMR (121.5MHz, CDCl<sub>3</sub>):  $\delta$  118.3 (s, OP), -143.0 (sept, PF<sub>6</sub>). Anal. Found: C, 43.35; H, 4.50; N, 2.20. Calcd. for C<sub>23</sub>H<sub>29</sub>F<sub>6</sub>NO<sub>2</sub>P<sub>2</sub>Pd: C, 43.59; H, 4.61; N, 2.21%.

**Complex [Pd{C(O)C<sub>3</sub>H<sub>5</sub>}Cl(NOP<sup>Me</sup><sub>2</sub>-N,P)] 5:** CO was bubbled through a solution of **1** (0.573 g, 1.09 mmol) in toluene (50 mL) at room temperature for 1 h. After filtration and removal of the volatiles under vacuum, the residue was washed with pentane (3x20 mL) and dried under vacuum, to afford **5** as a pale-yellow powder (0.550 g, 91% yield). Spectroscopic data: IR(CH<sub>2</sub>Cl<sub>2</sub>): 1688 (s, ν(CO)), 1638 (s, ν(CN)) cm<sup>-1</sup>. <sup>1</sup>H NMR (300.13 MHz, CDCl<sub>3</sub>, room temp.): δ 1.44 (s, 6H, NC(CH<sub>3</sub>)<sub>2</sub>), 1.99 (s, 6H, OC(CH<sub>3</sub>)<sub>2</sub>), 3.26 (dt, 2H, <sup>3</sup>J<sub>HH</sub> = 7.1 Hz, <sup>4</sup>J<sub>HH</sub> = 1.2 Hz, C(O)CH<sub>2</sub>), 3.87 (s, 2H, OCH<sub>2</sub>), 4.57 (dd, 1H, <sup>3</sup>J<sub>HH</sub> = 15.2 Hz, <sup>2</sup>J<sub>HH</sub> = 2.0 Hz, <sup>4</sup>J<sub>HH</sub> = 1.2 Hz, =CHH *trans* to -CH=), 4.86 (dm, 1H, <sup>3</sup>J<sub>HH</sub> = 10.1 Hz, =CHH *cis* to -CH=), 5.68 (m, 1H, -CH=), 7.41-7.46 (m, 6H, aromatic H), 7.65-7.72 (m, 4H, aromatic H). <sup>13</sup>C {<sup>1</sup>H} NMR (75.47 MHz, CD<sub>2</sub>Cl<sub>2</sub>): δ 27.3(s, NC(CH<sub>3</sub>)<sub>2</sub>), 28.1 (d, <sup>3</sup>J<sub>PC</sub> = 5.2 Hz, OC(CH<sub>3</sub>)<sub>2</sub>), 56.6 (d, <sup>3</sup>J<sub>PC</sub> = 21.6 Hz, C(O)CH<sub>2</sub>), 70.0 (s, NC(CH<sub>3</sub>)<sub>2</sub>), 77.5 (s, OC(CH<sub>3</sub>)<sub>2</sub>), 81.3 (s, OCH<sub>2</sub>), 117.0 (s, =CH<sub>2</sub>), 128.7 (d, <sup>3</sup>J<sub>PC</sub> = 11.3 Hz, *m*-aryl), 131.3 (d, <sup>2</sup>J<sub>PC</sub> = 14.9 Hz, *o*-aryl), 131.5 (s, *p*-aryl), 131.9 (s, -CH=), 135.1 (d, <sup>1</sup>J<sub>PC</sub> = 52.8 Hz, *ipso*-aryl), 169.7 (d, <sup>3</sup>J<sub>PC</sub> = 2.9 Hz, C=N), 226.7 (d, <sup>2</sup>J<sub>PC</sub> = 10.0 Hz, C=O). <sup>31</sup>P {<sup>1</sup>H} NMR (121.5 MHz, CDCl<sub>3</sub>): δ 100.8(s). Anal. Found : C, 52.10; H, 5.30; N, 2.45. Calcd. for C<sub>24</sub>H<sub>29</sub>ClNO<sub>3</sub>PPd: C, 52.19; H, 5.29; N, 2.54%.

**Complex [Pd{C(O)C<sub>3</sub>H<sub>5</sub>}Cl(NOPON<sup>Me</sup><sub>2</sub>-N,P)] 6:** CO was bubbled through a solution of **2** (0.500 g, 0.829 mmol) in toluene (40 mL) at room temperature for 1 h. After filtration and removal of the volatiles under vacuum, the residue was washed with pentane (2x20 mL) and dried under vacuum, to afford **6** as off-white powder(0.42g, 80% yield). Spectroscopic data: IR(CH<sub>2</sub>Cl<sub>2</sub>): 1692 (s, ν(CO)), 1661(m, ν(CN) of uncoordinated oxazoline), 1637 (s, ν(CN) of coordinated oxazoline) cm<sup>-1</sup>. <sup>1</sup>H NMR (300.13 MHz, C<sub>6</sub>D<sub>6</sub>, room temp.): δ 1.11 (s, 6H, NC(CH<sub>3</sub>)(CH<sub>3</sub>)), 1.26 (br s, 6H, NC(CH<sub>3</sub>)(CH<sub>3</sub>)), 1.51 (s, 6H, OC(CH<sub>3</sub>)(CH<sub>3</sub>)), 1.72 (s, 6H, OC(CH<sub>3</sub>)(CH<sub>3</sub>)), AB spin system: δ<sub>A</sub> 3.40 (2H, OCHH), δ<sub>B</sub> 3.43 (2H, OCHH), 4.01 (d, 2H, <sup>3</sup>J<sub>HH</sub> = 6.9 Hz, C(O)CH<sub>2</sub>), 5.02 (d, 2H, <sup>3</sup>J<sub>HH</sub> = 11.7 Hz, =CH<sub>2</sub>), 6.34

(m, 1H, -CH=), 7.02-7.07 (m, 3H, aromatic H), 7.86-8.13 (m, 2H, aromatic H).  $^{13}\text{C}\{^1\text{H}\}$  NMR (75.47 MHz,  $\text{C}_6\text{D}_6$ ):  $\delta$  27.3-28.0 (overlapping d and s,  $\text{OC}(\text{CH}_3)_2$  and  $\text{NC}(\text{CH}_3)_2$ ), 56.3 (d,  $^3J_{\text{PC}} = 25.9$  Hz,  $\text{C}(\text{O})\text{CH}_2$ ), 68.6 (br,  $\text{NC}(\text{CH}_3)_2$ ), 79.4 (s,  $\text{OC}(\text{CH}_3)_2$ ), 80.0 (s,  $\text{OCH}_2$ ), 116.6 (s,  $=\text{CH}_2$ ), 129.4 (d,  $^3J_{\text{PC}} = 11.1$  Hz, *m*-aryl), 130.8 (d,  $^2J_{\text{PC}} = 15.3$  Hz, *o*-aryl), 131.3 (s, *p*-aryl), 133.5 (s, -CH=), 137.7 (d,  $^1J_{\text{PC}} = 42.3$  Hz, *ipso*-aryl), 167.0 (br, C=N), 221.4 (d,  $^2J_{\text{PC}} = 16.8$  Hz, C=O).  $^{31}\text{P}\{^1\text{H}\}$  NMR (121.5 MHz,  $\text{CDCl}_3$ ):  $\delta$  118.4(s). Anal. Found: C, 49.15; H, 6.00; N, 4.35. Calcd. for  $\text{C}_{26}\text{H}_{38}\text{ClN}_2\text{O}_5\text{PPd}$ : C, 49.46; H, 6.07; N, 4.44%.
